# Supplementary material for: Therapy-Induced Senescent/Polyploid Cancer Cells Undergo Atypical Divisions Associated with Altered Expression of Meiosis, Spermatogenesis and EMT Genes
Source: MDPI journal article supplement (doi:10.3390/ijms23158288), 2022-07-27
Supplement: s1 [file s1]

Supplementary Materials:

(a)

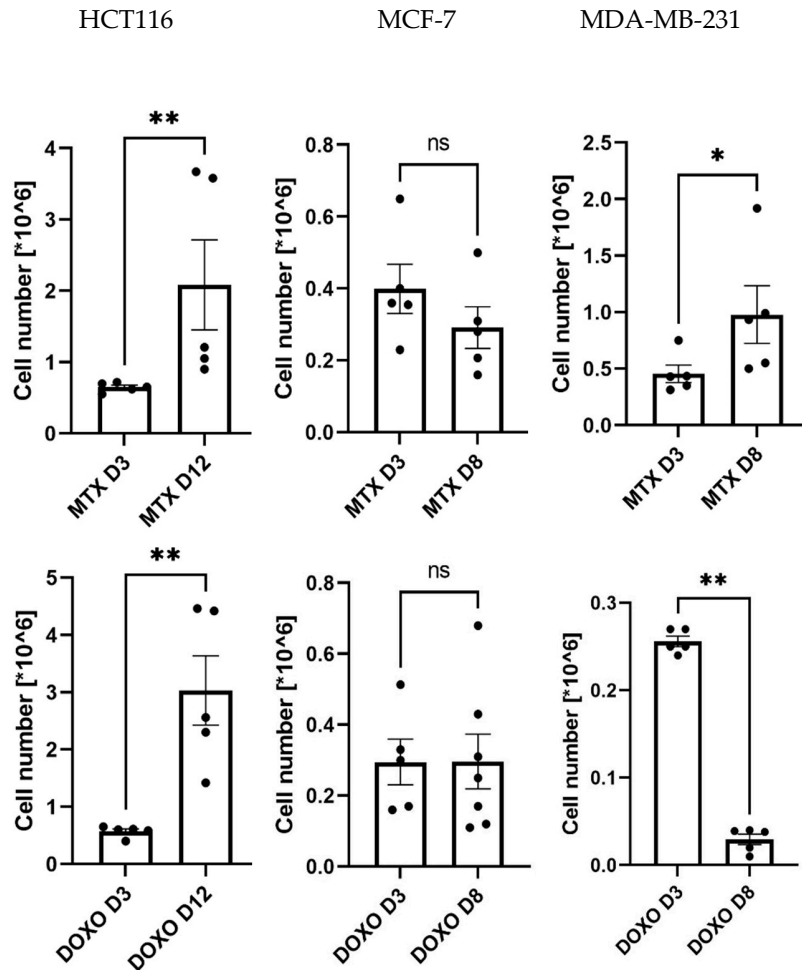

Suppl. Figure S1. Proliferation of various cancer cells is temporarily arrested after different chemotherapeutics (a) HCT116 colon cancer cells, MCF-7 and MDA-MB\_231 breast cancer cells counted on day 3 and day 8 or 12 after 24 hour treatment with the indicated drug. Bars represent mean of at least 3 independent experiments, error bars: SEM. Statistical significance: 0.01 < P < 0.05, \* 0.05 < P < 0.001, \*\*\*P < 0.001.

(a)

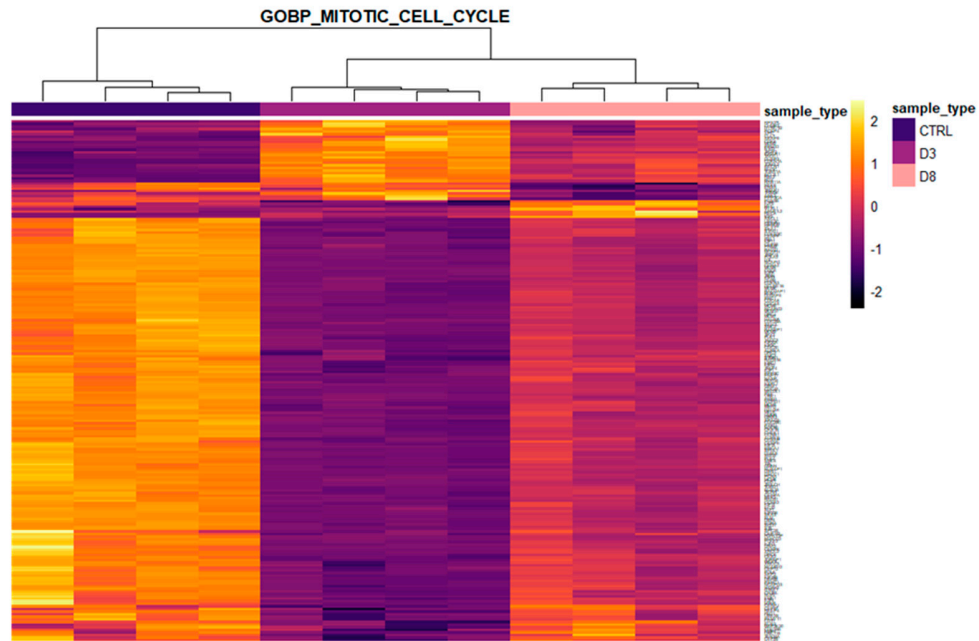

(b)

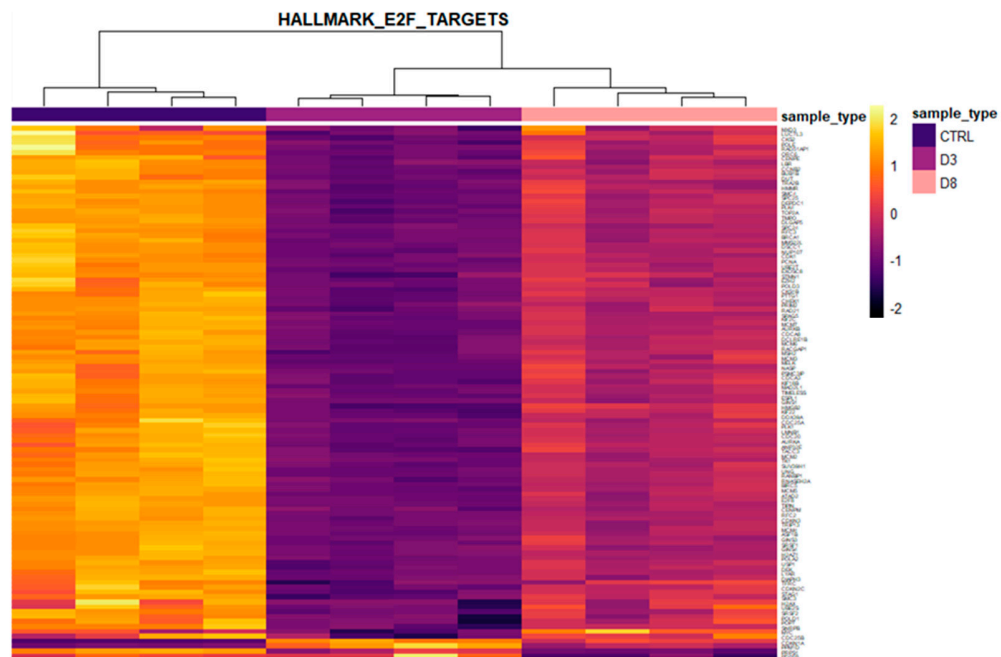

**Suppl. Figure S2. Rescue of proliferation related genes during Escape from Senescence** (a) Heatmap representing GOBP Mitotic Cell Cycle prepared on Differentially Expressed genes from the geneset. (b) Heatmap representing HALLMARK E2F Targets prepared on Differentially Expressed genes from the geneset.
